# Supplementary material for: Associations of SARS-CoV-2 serum IgG with occupation and demographics of military personnel
Source: PubMed Central journal article supplement (PMC8405017; doi:10.1371/journal.pone.0251114), 2021-08-30
Supplement: pone.0251114.s001.pdf [file pone.0251114.s001.pdf]

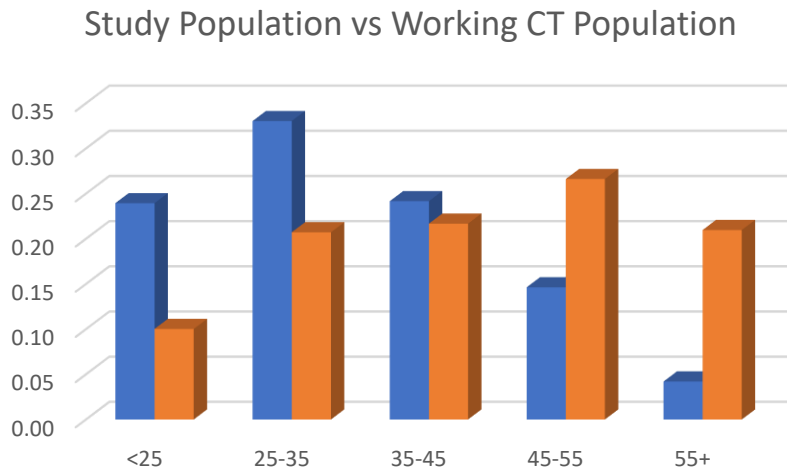

S1 Fig. Age distribution of study subjects vs. the local population. The % of workers (Y-axis) in different age ranges (X-axis) are depicted. Study subjects (blue bars) data from present study and local population (orange bars) estimates are from <https://statisticalatlas.com/state/Connecticut/Employment-Status#figure/employment-status-by-age>.
