# Supplementary material for: Associations of SARS-CoV-2 serum IgG with occupation and demographics of military personnel
Source: PubMed Central journal article supplement (PMC8405017; doi:10.1371/journal.pone.0251114), 2021-08-30

Joseph Zell, Adam V Wisnewski, Jian Liu, Jon Klein, Carolina Lucas, Martin Slade, Akiko Iwasaki and Carrie A Redlich

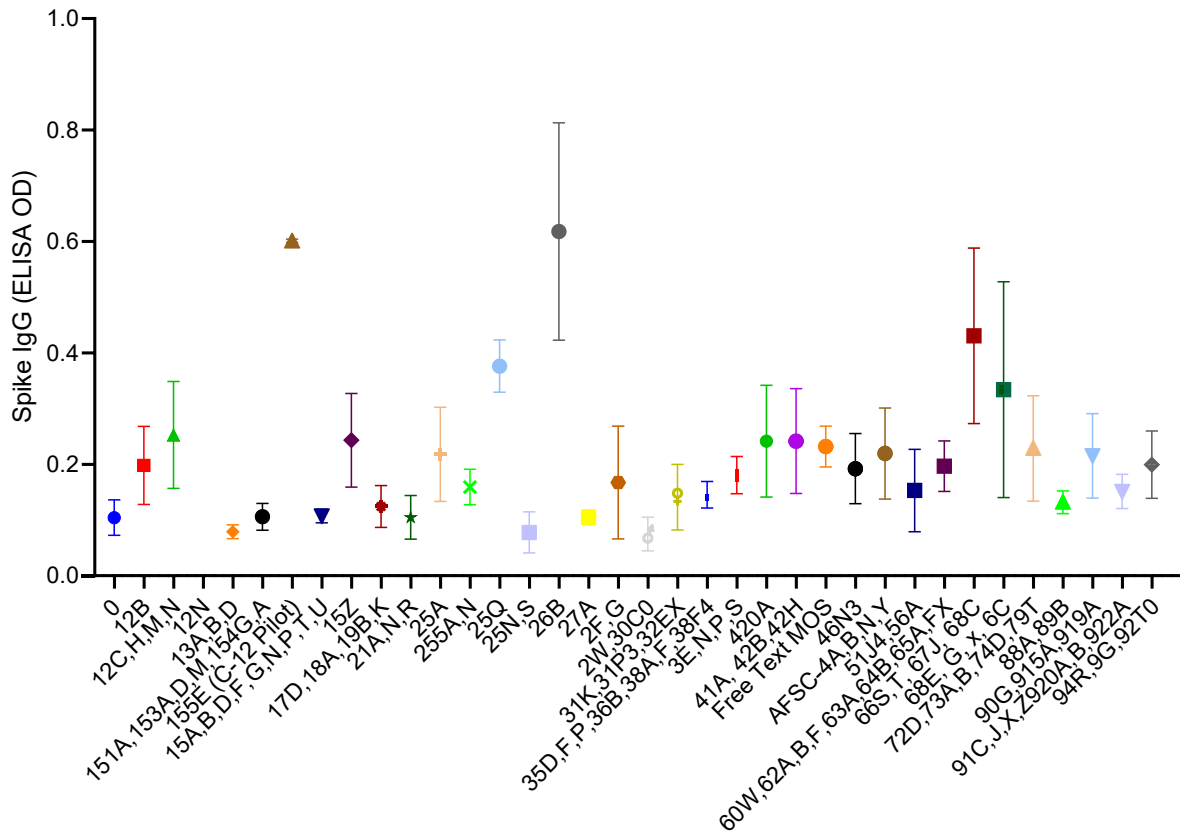

Supplement: pone.0251114.s002.pdf [file pone.0251114.s002.pdf]
